# Supplementary material
Source: publisher figshare collection journal article supplement (https://geolsoc.figshare.com/ndownloader/files/5424344)
Supplement: Supplementary file 1 [file 5424344]

Table S1.  Paleomagnetic poles selected for Paleo-Mesoproterozoic reconstruction model  (1950-1400 Ma)†,,,,,,,,,,
Plate ID,Age (Ma),Rock Unit,Plat (°N),Plon (°E),A95 (°),Test*,References,site lat °N,site long °E,Q(6)**
Laurentia,,,,,,,,,,
679,1382±2,Zig-Zag Dal basalt and related intrusions,11,240,3,C,after Evans and Mitchell (2011),82,325,111110
551,1401±6,McNamara Formation,-14,208,7,f,Elston et al. (2002),46.9,246.4,111111
49,~1434,Laramie complex and Sherman granite,-7,215,4,---,after Buchan et al. (2001),40.3,253.8,111001
550,1443±7,Purcell Lava,-24,216,5,f,Elston et al. (2002),49.4,245.1,111110
551,1450±14,Snowslip Formation,-25,210,4,f,Elston et al. (2002),47.9,245.9,111111
46,~1450,Harp Lake complex,2,206,4,---,after Buchan et al. (2001),55,297.7,111001
496,~1460,Michikamau anorthosite pluton,-2,218,5,C,after Buchan et al. (2001),54.5,296,111101
13,1476±16,St. Francois Mountains,-13,219,6,"c, f, g",Meert and Stuckey (2002),37.5,269.5,111110
48,ca. 1590,Western Channel Diabase,9,245,7,C,"Irving et al. (1972, 2004)",66.4,242.2,110110
,,,,,,,Hamilton and Buchan (2010),,,
48,1740+5/-4,Cleaver dykes,19,277,6,"c, C",Irving et al. (2004),67.5,242,111110
640,1818±4,Martin Formation,-9,288,9,f,Evans and Bingham (1973),59.6,251.4,110111
Slave,,,,,,,,,,
41,1870±4,Pearson mean,-22,269,6,C,Mitchell et al. (2010),65,250,110111
41,~1880,Douglas Peninsula Formation,-18,258,14,---,Irving and McGlynn (1979),62.8,249.7,101011
41,~1885,Seton mean,-6,260,4,c,Mitchell et al. (2010),65,250,111111
678,~2025,Lac de Gras dykes,12,268,7,"c, C",Buchan et al. (2009),64.4,249.6,111110
Superior,,,,,,,,,,
661,~1880,"Molson dykes, B+C2 components",29,218,4,C,after Evans and Halls (2010),55,262,111111
646,1998±2,Minto dykes,39,172,13,---,after Evans and Halls (2010),57,285,111011
Baltica,,,,,,,,,,
62,1452±12,Lake Ladoga mafic rocks,15,177,6,C,Lubnina et al. (2010),61.6,31,111111
528,~1560,Foglo-Sottunga dykes,28,188,9,C,Pesonen and Neuvonen (1981),60.2,20.6,110110
528,~1570,Kumlinge-Brando dykes,12,182,7,C,Pesonen and Neuvonen (1981),60.3,20.8,110110
528,1633±10,Sipoo quartz porphyry dykes,26,180,9,---,Mertanen and Pesonen (1995),60.3,25.3,111010
Sarmatia,,,,,,,,,,
523,~1755,Sarmatia anorthosites and dykes,27,169,4,"c, C",Elming et al. (2010),50.6,28.6,111111
Fennoscandia,,,,,,,,,,
62,1770±12,Shoksha Formation,40,221,4,G (low n),Pisarevsky and Sokolov (2001),61.4,33.8,111111
536,~1780,Småland intrusions,46,183,8,c,Pisarevsky and Bylund (2010),57,15.5,111111
62,~1880,Svecofennian Mean,41,233,5,c,Pesonen et al. (2003),,,
62,1974±27,Konchozero sill,-14,282,10,C,Pisarevsky and Sokolov (1999),62.1,34,101110
Amazonia,,,,,,,,,,
440,1416±7,Indiavaí gabbro,57,70,9,---,D'Agrella-Filho et al. (2012),-15.5,301.4,111000
441,1418.5±3.5,Nova Guarita dykes,48,66,7,C,Bispo-Santos et al. (2012),-10.3,304.8,111111
441,1789±7,Colider rhyolite suite,63,119,10,---,Bispo-Santos et al. (2008),-9.5,305.2,111011
Siberia (NW or SE of the Vilyuy-Patom axis),,,,,,,,,,
693,1473±24,Olenëk mafic intrusions (NW),-34,73,10,C,Wingate et al. (2009),70.7,124.2,111110
700,1863±9,Upper Akitkan - Chaya River (NW),-22,98,8,g,Didenko et al. (2009),57.6,110.8,111110
700,1878±4,Lower Akitkan - Malaya Kosa (NW),-31,99,4,"G, f",Didenko et al. (2009),54.7,108.8,111110
"Australia (N, S, or W craton)",,,,,,,,,,
78,1589±3,upper Balbirini Dolomite (N),-52,176,8,---,Idnurm (2000),-16.8,135.7,111011
78,1613±4,lower Balbirini Dolomite (N),-66,178,6,---,Idnurm (2000),-16.8,135.7,111011
78,1650±3,Tooganinie Sandstone (N),-61,187,6,f,Idnurm et al. (1995),-17.1,135.9,111111
78,~1660,Mallapunyah Formation (N),-35,214,3,f,Idnurm et al. (1995),-17.1,135.9,111111
78,1709±3,West Branch Volcanics (N),-16,201,11,G,Idnurm (2000),-14.3,133.2,111110
111,~1725,Peters Creek Volcanics (N),-26,221,5,g,Idnurm (2000),-17.8,138.2,111111
86,~1770,Elgee-Pentecost combined (N),-5,212,3,f,Schmidt and Williams (2008),-15.7,128.3,011110
146,~1800,Hamersley Province overprint (W),-35,212,3,f–,Li et al. (2000),-22,118,011010
187,~1890,Frere Formation (W),-45,220,2,(f),Williams et al. (2004),-26.3,121.9,111011
North China,,,,,,,,,,
369,1440-1560,Yangzhuang Formation,17,215,6,"f, R",Wu et al. (2005),40.2,117.6,011111
369,1769.1±2.5,Taihang dykes,36,247,3,C,Halls et al. (2000),40.2,113.5,111110
369,~1780,Xiong’er Group,50,263,5,---,Zhang et al. (2012),34,112.5,111011
India,,,,,,,,,,
712,1466±3,Lakhna Dykes,37,133,14,---,Pisarevsky et al. (2012),20.7,82.7,111011
712,~1880,Bastar Dykes and Cuddapah sills,-31,150,12,---,Meert et al. (2011),19,81.5,111011
Kalahari,,,,,,,,,,
400,~1875,post-Waterberg sills + Soutpansberg lavas,16,17,9,C,Hanson et al. (2004),-24,28,111110
"† Selected from a comprehensive survey of Precambrian paleomagnetic data (L.J. Pesonen,T.  Veikkolainen, and D.A.D. Evans, in preparation).",,,,,,,,,,
"Plat/Plon, pole latitude/longitude; A95, radius of circle of 95% confidence about the palaeopole.",,,,,,,,,,
"* Field stability test abbreviations: f – fold test, c – inverse contact test, C – baked-contact test, g – conglomerate test, G – intraformational conglomerate test,",,,,,,,,,,
,"R - correlatable polarity reversals. Note: capitalized symbols indicate primary magnetization, whereas lowercase symbols indicate merely ancient",,,,,,,,,
,remanence relative to the geological feature of the test.,,,,,,,,,
** Tabulation of the first six quality criteria of Van der Voo (1990).  The seventh criterion is impractical to apply to large databases of Precambrian rocks.,,,,,,,,,,
